# Supplementary material
Source: HighWire-hosted journal article supplement (https://www.cmaj.ca/content/suppl/2002/04/05/156.11)
Supplement: bk_rev_physiologic.pdf [file bk_rev_physiologic.pdf]

# Review of physiologic mechanisms in response to anemia

Paul C. Hébert,\* MD, FRCPC, MHSc; Ling Qun Hu,† MD, PhD;  
George P. Biro,‡ MD, PhD

## Abstract

**Objective:** To determine the nature and quality of the physiologic evidence regarding an "optimum" hemoglobin concentration in anemic patients or in patients with specific diseases.

**Literature search and selection:** Searches of MEDLINE from January 1966 to December 1996 were combined with manual searches of the bibliographies and references from experts. Citations were chosen by 2 reviewers if they were related to red blood cell transfusion practice and, more specifically, to physiologic adaptation to anemia. Disagreement was resolved through consensus.

**Literature synthesis:** The articles selected from the literature search were classified by study design and topic areas. Evidence-based inferences were derived from the literature.

**Results:** Of the 160 articles included in this review, 58 (36%) were human studies and 102 (64%) were laboratory studies. Most studies (84) fell into the "hemodilution" category, and were predominantly in animal models (70). Overall, 90 studies (56%) used a valid design with appropriate experimental and concurrent control groups (graded as level I or II). The distribution of grading was uniform throughout the categories. The quality of the evidence was deemed weaker for laboratory studies evaluating cardiac adaptation to anemia, largely because of a lack of reported concurrent controls in most studies. Inferences drawn from the literature were graded on a 4-point scale assessing the quality of the evidence; 13 of 18 statements were given the highest grade. The clinical significance of the Bohr effect and the shifts in the oxyhemoglobin curve following changes in pH were thought to be poorly studied and were rated lowest. The studies evaluating maximum oxygen delivery in anemia were rated as weak, partly because of conflicting reports. Of all identified studies, 56% were well designed and reported. Important adaptive responses to anemia consist of an elevation of cardiac output and its redistribution to favour the coronary and cerebral circulations at the expense of the splanchnic vascular beds; studies supporting these statements were rated highly. The evidence also suggests that patients with cardiac disease are at risk of adverse events from anemia.

**Conclusions:** There is a significant body of evidence supporting cardiovascular adaptive responses to anemia. However, there is a remarkable lack, in both quality and quantity, of clinical studies addressing how the "normal" physiologic adaptations may be affected by a variety of diseases. The physiologic evidence alone is insufficient to inform most decisions about red blood cell transfusion.

Many of the physiologic concepts in oxygen (O<sub>2</sub>) transport and utilization were described in the early part of the century and are still widely accepted.<sup>1</sup> In 1920, Barcroft<sup>2</sup> noted that tissue oxygenation was a function of hemoglobin concentration ([Hb]), oxygenation of blood by the lungs and cardiac output. Similarly, many of the principles underlying the transfer of O<sub>2</sub> from the microcirculation to the mitochondria are well established and have stood the test of time.<sup>1</sup>

Although much of the basic physiology underlying the delivery of O<sub>2</sub> has been extensively studied,<sup>1,3-5</sup> there are few, if any, systematic, comprehensive evaluations of the quality of the evidence in laboratory and clinical studies in

*Special Supplement*

*Supplément spécial*

*From \*the Department of Medicine, University of Ottawa, Ottawa, Ont.; †the Department of Medicine, Ottawa General Hospital, Ottawa, Ont.; and ‡the Department of Physiology, University of Ottawa, Ottawa, Ont.*

anemia. By adapting recently proposed principles for systematic reviews,<sup>6-8</sup> we provide a detailed and critical appraisal of the physiologic literature, addressing primarily the following questions: Does the evidence from physiologic studies suggest an "optimal" [Hb] for the majority of anemic patients or patients with specific diseases? Are certain patients at increased risk from the physiologic consequences of anemia? Thus, this systematic review will provide the practising physician with a simplified synthesis of physiologic information relevant to decisions about red blood cell (RBC) transfusion. To fulfill this objective, some of the more complex mechanisms were deliberately omitted or oversimplified.

## Literature search and selection

A search of MEDLINE from January 1966 to July 1996 was constructed using the following medical subject headings (MeSHs): blood transfusion, erythrocyte transfusion, blood component transfusion. The strategy involved searching the database for the presence of these terms as keywords and text words in the titles and abstracts of all citations. The results were combined with a specific MEDLINE search during the same time period that used the MeSHs: blood transfusion, oxygen, cerebral artery, cerebral artery disease, cerebral ischemia, cerebrovascular circulation, subarachnoid hemorrhage, coronary circulation, coronary disease, coronary vessels. No limitations were placed on the computer searches; therefore, all types of studies in all languages were initially included. Bibliographies were searched manually and additional studies were identified by contacting Canadian experts in O<sub>2</sub> kinetics, physiology and microcirculation. Citations and abstracts generated through the MEDLINE searches were scanned by 2 reviewers.

Articles were initially selected because of their relevance to RBC and plasma transfusion practice. A second step focused on selecting articles that addressed the physiologic responses to anemia and red cell transfusions. The final selection of articles was also limited to studies with an English or French abstract. Articles were categorized according to topic and study type. Data from all articles were gathered, interpreted and summarized by two authors. From the synthesis of the information, the quality of evidence for each of the summary statements was also tabulated and agreed upon. The clinical evidence was graded according to the classification of Wolfe.<sup>9</sup> Given that physiologic concepts were considered in this systematic overview, we also graded laboratory studies and the evidence derived from such studies (Table 1). All disagreements in the selection and interpretation of studies were resolved through consensus.

## Results

Computer searches yielded 8426 citations. Of these, 1424 articles were determined to be relevant to CPGs on the use of RBCs and plasma. Among them, 160 articles addressed aspects of physiologic mechanisms in anemia (Table 2): 58 (36%) were human studies and 102 (64%) were laboratory studies. The greatest number of studies (84) were in the category "hemodilution," predominantly conducted in animal models (70). Normovolemic hemodilution was the most common model in the study of adaptive physiologic mechanisms in anemia.

**Table 1. System used to grade studies**

| Level of evidence                  | Description of criteria*                                                                                                                                                                                                                                                                                                                                                                                                                                                            |
|------------------------------------|-------------------------------------------------------------------------------------------------------------------------------------------------------------------------------------------------------------------------------------------------------------------------------------------------------------------------------------------------------------------------------------------------------------------------------------------------------------------------------------|
| <b>Individual studies</b>          |                                                                                                                                                                                                                                                                                                                                                                                                                                                                                     |
| LI                                 | Concurrent controls used (random allocation should be used wherever possible).<br>Experimental methods proven valid (at a minimum, appropriate positive and negative controls must be described).<br>Objective primary measure(s) or objective interpretation of measure(s).<br>Demonstrates relevant difference between groups (not limited to statistical significance).<br>Study conducted in humans or in an experimental model representative of human biological process(es). |
| LII                                | Concurrent controls used.<br>All previous criteria present but major limitation(s) in the application of model to humans; small sample size or difference(s) among groups are not significant.                                                                                                                                                                                                                                                                                      |
| LIII                               | Control group not concurrent<br>Major limitation in the primary outcome measure(s) or<br>Experimental methods not reproducible or valid.                                                                                                                                                                                                                                                                                                                                            |
| LIV                                | Controls not used.                                                                                                                                                                                                                                                                                                                                                                                                                                                                  |
| <b>Inferences from all studies</b> |                                                                                                                                                                                                                                                                                                                                                                                                                                                                                     |
| CI                                 | Inferences based on at least two LI studies from independent investigators.<br>No LI studies demonstrating conflicting results.                                                                                                                                                                                                                                                                                                                                                     |
| CII                                | Inferences based on one LI study with no conflicting LI or LII evidence.                                                                                                                                                                                                                                                                                                                                                                                                            |
| CIII                               | Inferences based on at least one LII study with no conflicting LII evidence.                                                                                                                                                                                                                                                                                                                                                                                                        |
| CIv                                | Inferences based on theory, LIII or LIV studies or conflicting LI or LII evidence.                                                                                                                                                                                                                                                                                                                                                                                                  |

\* Criteria are designed to grade studies evaluating biologic processes, not to evaluate outcomes from therapy. Studies evaluating outcome measures similar to clinical outcomes in the laboratory setting (e.g., a survival study in an animal model) should use rigorous experimental designs comparable to human studies (i.e., a double-blind randomized controlled clinical trial is optimal).

Overall, 90 studies (56%) used a valid design with appropriate experimental and concurrent control groups (graded as LI or LII). The distribution of grading was uniform throughout the categories. The quality of the evidence was deemed weaker for laboratory studies evaluating cardiac adaptation to anemia, largely because of a lack of reported concurrent controls in most studies.

The 18 statements reflecting inferences drawn from the literature were graded according to a 4-point scale (Table 3); 13 were given the highest rating (Ci) based on assessment of the quality of the evidence. The clinical significance of the Bohr effect and shifts in the oxyhemoglobin curve were thought to be poorly studied and were rated accordingly (Civ). The studies evaluating maximum O<sub>2</sub> delivery in anemia were rated as weak, partly because of conflicting reports.

## Overview of O<sub>2</sub> transport

Detailed reviews of the physiologic principles of O<sub>2</sub> transport may be found in textbooks and review arti-

cles.<sup>1,4,5</sup> Hemoglobin is a complex molecule consisting of 4 globin moieties, each incorporating an iron-containing heme ring where O<sub>2</sub> is bound according to its partial pressure (PO<sub>2</sub>). The O<sub>2</sub> binding affinity of hemoglobin is illustrated by the sinusoidal relationship between hemoglobin O<sub>2</sub> saturation and PO<sub>2</sub> (Fig. 1). This relationship, referred to as the oxyhemoglobin dissociation curve, enables both efficient loading in the lungs at high PO<sub>2</sub> and efficient unloading in the tissues at low PO<sub>2</sub> levels. However, the O<sub>2</sub> binding affinity of hemoglobin (the degree to which O<sub>2</sub> molecules saturate the hemoglobin binding sites at a given PO<sub>2</sub>) may be altered by various disease states and may play a significant adaptive role in response to anemia.

The amount of O<sub>2</sub> delivered, either to the whole body or to specific organs, is the product of blood flow and arterial O<sub>2</sub> content. For the whole body, O<sub>2</sub> delivery (DO<sub>2</sub>) is the product of total blood flow or cardiac output (CO) and arterial O<sub>2</sub> content (CaO<sub>2</sub>):

$$DO_2 = CO \times CaO_2 \quad [1]$$

When a person is breathing ambient air under nor-

**Table 2: Grading of studies evaluating biological processes**

| Topic of study                                                     | No, (%)    | Level of evidence |           |           |         |
|--------------------------------------------------------------------|------------|-------------------|-----------|-----------|---------|
|                                                                    |            | LI                | LII       | LIII      | LI      |
| O <sub>2</sub> delivery and consumption                            | 27 (16.8)  |                   |           |           |         |
| Human                                                              | 24 (15.0)  | 12                | 2         | 9         | 1       |
| Laboratory                                                         | 3 (1.9)    | 2                 | 0         | 1         | 0       |
| Adaptation to anemia or transfusions                               | 49 (30.6)  |                   |           |           |         |
| Cardiac adaptation                                                 |            |                   |           |           |         |
| Human                                                              | 8 (5.0)    | 0                 | 0         | 6         | 2       |
| Laboratory                                                         | 23 (14.4)  | 0                 | 17        | 6         | 0       |
| Microcirculation and viscosity                                     |            |                   |           |           |         |
| Human                                                              | 1 (0.6)    | 0                 | 1         | 0         | 0       |
| Laboratory                                                         | 5 (3.1)    | 3                 | 2         | 0         | 0       |
| Oxyhemoglobin dissociation curve and 2,3-DPG concentration studies | 12 (7.5)   | 3                 | 5         | 2         | 2       |
| Hemodilution                                                       | 84 (52.5)  |                   |           |           |         |
| Cardiovascular effect*                                             |            |                   |           |           |         |
| Human                                                              | 4 (2.5)    | 0                 | 2         | 2         |         |
| Laboratory                                                         | 17 (10.6)  | 10                | 1         | 6         | 0       |
| Coronary flow studies                                              |            |                   |           |           | 0       |
| Human                                                              | 7 (4.4)    | 3                 | 1         | 2         |         |
| Laboratory                                                         | 47 (29.4)  | 16                | 2         | 28        | 1       |
| Cerebral flow studies                                              |            |                   |           |           | 1       |
| Human                                                              | 3 (1.9)    | 1                 | 1         | 1         |         |
| Laboratory                                                         | 4 (2.5)    | 4                 | 0         | 0         | 0       |
| Other organ flow                                                   | 2 (1.3)    | 0.00              | 2         | 0.00      | 0       |
| Total human studies                                                | 58 (36.3)  | 19                | 11        | 22        | 6       |
| Total laboratory studies                                           | 102 (63.8) | 35                | 25        | 41        | 1       |
| Total %                                                            | 160        | 54 (33.8)         | 36 (22.5) | 63 (39.4) | 7 (4.4) |

Note: 2,3-DPG = 2,3-diphosphoglycerate.

\*We differentiated between studies focusing on mechanisms of cardiac adaptation and those looking at the cardiovascular effects of hemodilution.

mal conditions, the O<sub>2</sub> present in their arterial blood is bound to hemoglobin. When fully saturated, 1 g of hemoglobin binds 1.39 mL of O<sub>2</sub>. A small amount is also dissolved in plasma water. The negligible amount of dissolved O<sub>2</sub> is directly proportional to the partial pressure and may be calculated by multiplying PO<sub>2</sub> by a constant

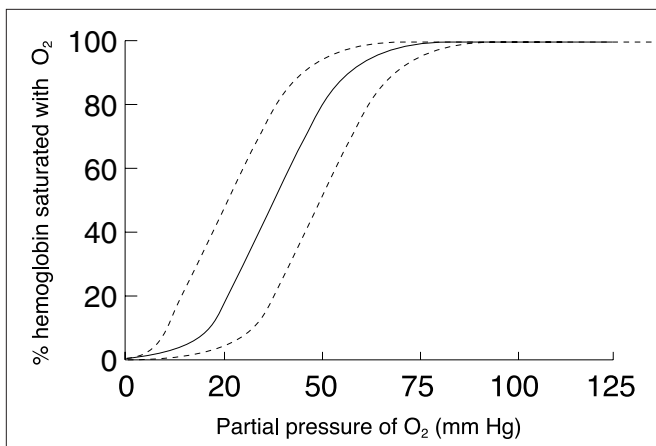

**Fig. 1: The oxyhemoglobin dissociation curve. The solid line represents O<sub>2</sub> binding affinity to the hemoglobin molecule at standard temperature (37°C) and pH (7.4). The dashed lines represent hypothetical shifts in the curve: to the right with increased 2,3-diphosphoglycerate (2,3-DPG) levels or decreased temperature or pH; to the left with decreased 2,3-DPG or increased temperature or pH.**

(k = 0.00301 mL/mL per mm Hg), termed the solubility coefficient. Thus, under most circumstances, arterial O<sub>2</sub> content may be estimated from the portion bound to hemoglobin using the equation:

$$\text{CaO}_2 \text{ (in mL/L)} = \% \text{ saturation} \times 1.39 \text{ (mL/g)} \times [\text{Hb}] \text{ (g/L)} \quad [2]$$

If we substitute CaO<sub>2</sub> from [2] into [1], then:

$$\text{DO}_2 = \text{CO} \times (\% \text{ saturation} \times 1.39 \times [\text{Hb}]) \quad [3]$$

Where, CO is cardiac output in L/min and % saturation is the percentage of hemoglobin saturated with O<sub>2</sub>.

CO, a measure of blood flow to the entire body, is the other major determinant of O<sub>2</sub> delivery. It may be quantified by multiplying the stroke volume (the difference between end diastolic volume and end systolic volume in millilitres) and heart rate (in beats per minute). Stroke volume is influenced by preload (end diastolic volume affected by filling pressure), afterload (the arterial pressure and resistance encountered during each ventricular ejection) and contractility (the force generated during a contraction). The majority of O<sub>2</sub> consumed by the heart is expended by the contracting myocyte. The heart requires a continuous supply of O<sub>2</sub> via the coronary circulation. This supply is tightly coupled to metabolic demand, primarily through regulated blood flow rather than increased O<sub>2</sub> extraction. The O<sub>2</sub> supply–demand relation is mediated by metabolic byproducts such as adenosine.<sup>183</sup>

**Table 3: Inferences drawn from and the quality of evidence graded by 2 observers**

| Inference                                                                                                                                              | Quality of evidence |
|--------------------------------------------------------------------------------------------------------------------------------------------------------|---------------------|
| <b>Oxyhemoglobin dissociation curve</b>                                                                                                                |                     |
| Anemia shifts the oxyhemoglobin curve to the right because of increased 2,3-DPG levels                                                                 | Ci                  |
| Anemia causes clinically significant rightward shifts in the oxyhemoglobin curve because of the Bohr effect                                            | Civ                 |
| The shift in the oxyhemoglobin curve has been clearly established in many forms of anemia (excluding hemoglobinopathies)                               | Cii                 |
| The shift in the oxyhemoglobin curve has been clearly established in a number of human diseases                                                        | Civ                 |
| <b>Cardiac output</b>                                                                                                                                  |                     |
| Cardiac output increases with increasing degrees of normovolemic anemia provided that blood volume is adequate                                         | Ci                  |
| Increased cardiac output in normovolemic anemia is a result of increased stroke volume                                                                 | Ci                  |
| The contribution of increased heart rate to the increase in cardiac output following normovolemic anemia is variable                                   | Ci                  |
| <b>Other hemodynamic alteration</b>                                                                                                                    |                     |
| Changes in blood viscosity result in many of the hemodynamic changes in normovolemic anemia                                                            | Ci                  |
| Normovolemic anemia is accompanied by increased sympathetic activity                                                                                   | Ci                  |
| Normovolemic anemia causes increased myocardial contractility                                                                                          | Cii                 |
| Normovolemic anemia causes a decrease in systemic vascular resistance                                                                                  | Ci                  |
| Normovolemic anemia results in a redistribution of cardiac output toward the heart and brain and away from the splanchnic circulation                  | Ci                  |
| Maximum global O <sub>2</sub> delivery occurs at hemoglobin concentrations ([Hb]) of 100–110 g/L                                                       | Ciii                |
| Global O <sub>2</sub> delivery declines above and below [Hb] of 100–160 g/L                                                                            | Ci                  |
| <b>Coronary and cerebral blood flow</b>                                                                                                                |                     |
| Coronary blood flow is increased during anemia                                                                                                         | Ci                  |
| Cerebral blood flow is increased during anemia                                                                                                         | Ci                  |
| Coronary artery disease in the presence of moderate degrees of anemia ([Hb] below 90 g/L) results in impaired left ventricle contractility or ischemia | Ci                  |
| Moderate anemia does not aggravate cerebral ischemia in patients with cerebrovascular disease                                                          | Ci                  |

Note: 2,3-DPG = 2,3-diphosphoglycerate.

During a ventricular contraction, there is an increase in pressure followed by ejection of a fraction of the ventricular volume. Whereas, changes in both pressure and volume are needed to perform work (work in the physical sense is the product of pressure and volume), the rate of O<sub>2</sub> consumption or energy expenditure by the heart is less for a change in volume than for a comparable change in pressure.<sup>184,185</sup>

However, according to Laplace's Law:

$$T = (P \times R)/H \quad [4]$$

where  $T$  is wall tension,  $P$  is intracavitary pressure,  $R$  is radius and  $H$  is wall thickness. Greater wall tension is generated in ejecting a given stroke volume if the radius is increased. This means that an enlarged failing heart or an overfilled ventricle is less efficient in ejecting blood.

It follows that in an experiment evaluating cardiac function or the effect of interventions, such as anemia and transfusions, all but a single variable should be controlled because of the interdependence of these factors.

In the heart, unlike other organs, tissue hypoxia (and anoxia) will eventually occur if O<sub>2</sub> delivery is permitted to decrease to a level at which tissues no longer have enough O<sub>2</sub> to meet metabolic demands. From equations [1] and [3], it is apparent that tissue hypoxia may be caused by decreased O<sub>2</sub> delivery due to decreases in either [Hb] (anemic hypoxia), CO (stagnant hypoxia) or hemoglobin saturation (hypoxic hypoxia). Each of the determinants of DO<sub>2</sub> has substantial physiologic reserves, thereby enabling the human body to adapt to significant increases in O<sub>2</sub> requirements or decreases in 1 of the determinants of DO<sub>2</sub> as a result of various diseases.

In health, the amount of O<sub>2</sub> delivered to the whole body exceeds resting O<sub>2</sub> requirements by a factor of 2 to 4. For example, if we assume a [Hb] of 150 g/L, 99% saturation of hemoglobin with O<sub>2</sub> and CO of 5 L/minute, then O<sub>2</sub> delivery will be 1032 mL/minute. At rest, the amount of O<sub>2</sub> required or consumed by the whole body will range from 200 to 300 mL/minute. A decrease in [Hb] to 100 g/L would result in an O<sub>2</sub> delivery of 688 mL/minute. Despite this 33% decrease in O<sub>2</sub> delivery, there remains a twofold excess of O<sub>2</sub> delivery compared with O<sub>2</sub> consumption. However, a further drop in [Hb] to 50 g/L with all other parameters, including CO, remaining constant will decrease O<sub>2</sub> delivery to a critical level of 342 mL/minute. Under stable experimental conditions, this dramatic decrease in O<sub>2</sub> delivery would not affect O<sub>2</sub> consumption; however, below a critical level or threshold of O<sub>2</sub> (DO<sub>2</sub> [crit]), O<sub>2</sub> consumption will decrease with further decreases in [Hb] (and decreased O<sub>2</sub> delivery).

There is, therefore, a biphasic relation between O<sub>2</sub> delivery and consumption (Fig. 2); an O<sub>2</sub> delivery-inde-

pendent portion of the relationship above a threshold value, where O<sub>2</sub> consumption is independent of O<sub>2</sub> delivery, and a delivery or supply-dependent portion, where O<sub>2</sub> delivery is linearly related to O<sub>2</sub> consumption. The latter portion of this relationship indicates the presence of tissue hypoxia. Both laboratory and clinical studies have attempted to determine DO<sub>2</sub> (crit). The most rigorous clinical study<sup>17</sup> found a threshold value of 4 mL/min per kilogram, whereas other clinical and laboratory studies found values in the range of 6–10 mL/min per kilogram.<sup>17–20</sup>

DO<sub>2</sub> measured for the whole body is a composite for all organs, whose individual anaerobic thresholds may be significantly different from the average DO<sub>2</sub> (crit). In addition, the anaerobic threshold and associated DO<sub>2</sub> (crit) values will also vary substantially with metabolic rate, some disease states and perhaps such complex factors as a patient's age or genetic make-up. In the previous example, blood flow to the whole body as reflected by CO did not increase as would otherwise be expected in anemia.

Once blood is oxygenated, it is distributed to all organs and tissues through the arterial tree. Organ blood flow is controlled by arterial tone in medium-sized vessels, which responds primarily to changes in autonomic stimulation and the release of locally generated vasodilating substances. Within organ systems, RBCs are carried into a network of capillaries where O<sub>2</sub> is released to the tissues through the thin walls. Once released, O<sub>2</sub> diffuses through the interstitial space, finally finding its way into cells and their mitochondria to be used in cellular respiration. Each of these physiologic mechanisms may be altered in disease states.

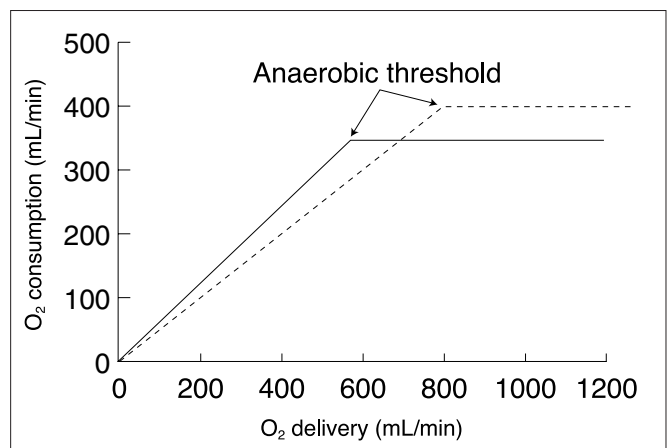

**Fig. 2: The biphasic relation between O<sub>2</sub> consumption and O<sub>2</sub> delivery. The dashed line illustrates the postulated changes in the relation in the presence of diseases such as sepsis or adult respiratory distress syndrome. The anaerobic threshold is shifted to the right suggesting that patients require increased levels of delivery to avoid ongoing ischemic damage to vital organs.**

## Adaptive mechanisms in anemia

In anemia, O<sub>2</sub> carrying capacity is decreased but tissue oxygenation is preserved at [Hb] well below 100 g/L. Adaptive responses include a shift in the oxyhemoglobin dissociation curve, hemodynamic alterations and microcirculatory alterations.

The shift to the right of the oxyhemoglobin dissociation curve in anemia is primarily the result of increased synthesis of 2,3-diphosphoglycerate (2,3-DPG) in RBCs.<sup>21-34</sup> This enables more O<sub>2</sub> to be released to the tissues at a given PO<sub>2</sub>, offsetting the effect of the reduced O<sub>2</sub> carrying capacity of the blood. This shift also occurs in vitro with decreases in temperature and pH.<sup>35</sup> Because measurements of hemoglobin O<sub>2</sub> saturation are generally performed on arterial specimens processed at standard temperature and pH, they will not reflect O<sub>2</sub> binding affinity and unloading conditions in the patient's microcirculatory environment, which may be affected by temperature, pH and a number of disease processes. The shift in the oxyhemoglobin dissociation curve because of decreases in pH (increase in hydrogen ion concentration) is referred to as the Bohr effect.<sup>35,36</sup> Because changes in pH rapidly affect the hemoglobin molecule's ability to bind O<sub>2</sub>, this mechanism has been postulated to be an important early adaptive response to anemia.<sup>37</sup> However, the equations describing the physical process indicate that a very large change in pH is required to modify the P<sub>50</sub> by a clinically important amount (i.e., about 10 mm Hg). As a result, the Bohr effect is unlikely to have important clinical consequences.<sup>35,36</sup>

Several hemodynamic alterations also occur following the development of anemia. The most important determinant of cardiovascular response is the patient's volume status or more specifically, left ventricular preload. The combined effect of hypovolemia and anemia often occur as a result of blood loss. Thus, acute anemia may cause tissue hypoxia or anoxia through both diminished CO resulting in stagnant hypoxia and decreased O<sub>2</sub> carrying capacity (anemic hypoxia).<sup>1,3-5</sup> The body attempts to preserve O<sub>2</sub> delivery to vital organs primarily by redistributing the available cardiac output through increased arterial tone. The adrenergic system plays an important role in altering blood flow to and within specific organs. The renin-angiotensin-aldosterone system is also stimulated to retain both water and sodium. Losses in blood volume of 5% to 15% result in variable increases in resting heart rate and diastolic blood pressure. Orthostatic hypotension is often a sensitive indicator of relatively small losses in blood volume that are not sufficient to cause a marked blood pressure fall in the supine position. Larger losses will result in progressive increases in heart rate and decreases in arterial blood pressure accompanied by

evidence of organ hypoperfusion. The increased sympathetic tone diverts an ever decreasing global blood flow (CO) away from the splanchnic, skeletal and cutaneous circulation toward the coronary and cerebral circulation. Once vital organ systems such as the kidneys, the central nervous system and the heart are affected, the patient is considered in hypovolemic shock. Although the American College of Surgeons' Committee on Trauma<sup>38</sup> has categorized the cardiovascular and systemic response to acute blood loss according to degree of blood loss, many of these responses are modified by the rapidity of blood loss and patient characteristics such as age, comorbid illnesses, pre-existing volume status and [Hb], the use of medications having cardiac (i.e., beta blockers) or peripheral vascular effects (i.e., antihypertensives).

The compensatory changes in CO have been the most thoroughly studied cardiovascular consequences of normovolemic anemia. When intravascular volume is stable or increases following the development of anemia, increases in CO have been consistently reported. Indeed, an inverse relation between [Hb] and CO has been clearly established in well-controlled laboratory studies (Fig. 3).<sup>37,39-44</sup> An attempt is made to control intravascular volume in most studies. However, there was insufficient information in these reports to ascertain whether the investigators were successful in controlling relevant factors, such as venous tone and total blood volume. Similar clinical observations were made in the perioperative setting<sup>45-52</sup> and in chronic anemia.<sup>39,53-55</sup> Unfortunately, the strength of inferences from clinical studies is limited by confounding factors arising from major comorbid illnesses such as cardiac disease, lack of an appropriate control group and significant weaknesses in study design. Researchers have also attempted to determine the level of anemia at which CO begins to rise. Reported thresholds for this phenomenon have ranged from 70 to 120 g/L.<sup>37,39,56-59</sup>

Two mechanisms are thought to be principally responsible for the physiologic processes underlying increased CO during normovolemic anemia: reduced blood viscosity and increased sympathetic stimulation of the cardiovascular effectors.<sup>1,42,60-62</sup> Blood viscosity affects both preload and afterload, two of the major determinants of CO<sup>60,63,64</sup> whereas sympathetic stimulation primarily increases heart rate and contractility. Compared with hypovolemic anemia, in compensation for normovolemic anemia, the effects of blood viscosity appear to predominate.<sup>63-65</sup>

The interactions between blood flow, blood viscosity and CO are complex. In blood vessels, blood flow affects whole blood viscosity and in turn, blood viscosity modulates CO. Under experimental conditions, blood flow in a rigid hollow cylinder is directly related to the 4th

power of the diameter and the driving pressure and inversely related to the cylinder length and blood viscosity (Poiseuille-Hagen Law).<sup>1,60,61</sup> Also, blood viscosity will increase as flow decreases because of increasing aggregation of RBCs. Thus, viscosity is highest in postcapillary venules where flow is the slowest and lowest in the aorta where flow is fastest. In postcapillary venules, a disproportionate decrease in blood viscosity occurs as anemia worsens and, as a consequence, venous return is augmented for a given venous pressure.

If cardiac function is normal, the increase in venous return or left ventricular preload will be the most important determinant of the increased CO during normovolemic anemia. The conclusion is based on experiments in which viscosity was maintained during anemia using high viscosity colloidal solutions. In such studies,<sup>63</sup> the cardiovascular effects were attenuated compared with similar levels of hemodilution accompanied by reduced whole blood viscosity. Decreased left ventricular afterload, another cardiac consequence of decreased blood viscosity, may also be an important mechanism in maintaining cardiac output if ventricular function is impaired.<sup>63</sup>

Investigators<sup>42,57,63,64,66-68</sup> have also noted alterations in sympathetic stimulation. Anemia causes an increase in heart rate.<sup>37,60,69</sup> This physiologic response is thought to be predominantly mediated by aortic chemoreceptors<sup>42,62</sup> and release of catecholamines.<sup>42,43,66,70,71</sup> However, primary laboratory studies<sup>71,72</sup> and studies of perioperative normovolemic hemodilution<sup>45-47</sup> and chronic anemia<sup>53,54</sup> have not consistently demonstrated significant increases in heart rate in response to moderate degrees of anemia. A detailed review<sup>60</sup> indicated significant differences in

species response as well as differences between awake and anesthetized patients. Anesthesia and mechanical ventilation may have significant effects on sympathetic tone, left ventricular loading conditions and contractility. Therefore, the presence of anesthesia and various anesthetic techniques will confound assessments of the relation between heart rate and anemia. Three poorly controlled studies in children did not agree on the contribution of tachycardia<sup>54,73</sup> and stroke volume<sup>74</sup> to the increase in CO.

In summary, the anemia-induced increase in CO is more dependent on stroke volume and, to a lesser extent on heart rate, in most clinical settings. If increased heart rate occurs following normovolemic anemia, one of its major consequences will be to inhibit coronary blood flow by shortening diastole when the left ventricular myocardium is perfused.<sup>75,76</sup> The shortening of diastolic filling time alone is usually insufficient to induce myocardial ischemia in normal subjects. However, the combined effects of decreased diastolic time and anemia may have significant consequences in the presence of coronary artery disease. The O<sub>2</sub> supply-demand relation may also be adversely affected by additional changes to ventricular loading conditions.

Sympathetic stimulation may also affect CO by enhancing myocardial contractility<sup>77,78</sup> and increasing venomotor tone.<sup>42,79</sup> The effects of anemia on left ventricular contractility in isolation have not been clearly determined, given the complex changes in preload, afterload and heart rate. Only one before-and-after hemodilution study used load-independent measures of increased left ventricular contractility.<sup>78</sup> Chapler and Cain<sup>42</sup> have summarized several well-controlled animal studies indicating that venomotor tone is increased and that it results from stimulation of the aortic chemoreceptors. If sympathetic stimulation is significant in the specific clinical setting, then contractility will be increased from stimulation of the beta-adrenergic receptors.<sup>60,66,68,77</sup>

Under laboratory conditions, several investigators<sup>70,80-84</sup> have observed significant increases in coronary blood flow directly related to the degree of normovolemic anemia. These studies do not demonstrate significant shifts in the transmural distribution of coronary flow between endocardium and epicardium in the normal coronary circulation during moderate degrees of anemia. Further, significant alterations in the distribution of flow between major organs following acute hemodilution have also been documented.<sup>37,42,65,72,80,84-88</sup> Disproportionate increases in coronary and cerebral blood flow occurred with simultaneous decreases in blood flow to the splanchnic circulation.

The inverse relation between CO and [Hb] has led investigators to try to find the [Hb] at which O<sub>2</sub> trans-

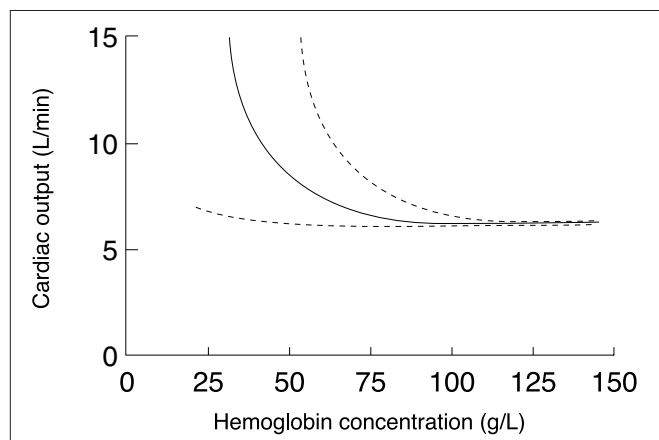

**Fig. 3: The theoretical effect of hemoglobin concentration ([Hb]) on cardiac output. The solid curve describes this relation in a healthy adult. The upper dashed line shows how the cardiac output response may be accentuated in a young athlete; the lower dashed line might correspond to poor cardiovascular function.**

port is maximum. In a canine model, Richardson and Guyton<sup>89</sup> established that optimum O<sub>2</sub> transport occurred at a hematocrit of 40% to 60%; others<sup>80,84,90</sup> have determined that maximum O<sub>2</sub> delivery occurs at the low end of this range (40%–45%). However, one of the most widely quoted studies<sup>59</sup> found that peak O<sub>2</sub> transport occurred at a hematocrit of 30% ([Hb] 100 g/L). Unfortunately, global indices of optimum O<sub>2</sub> delivery will mask any differences in blood flow between specific organs.<sup>65,70,91,92</sup> In addition, attempting to identify a single [Hb] that maximizes O<sub>2</sub> delivery overlooks the large number of factors interfering with adaptive mechanisms in anyone other than healthy young patients with anemia. None of the identified studies defined optimal hematocrits under experimental conditions that emulate various disease states potentially affecting O<sub>2</sub> demand.

Will the transfusion of allogeneic RBCs reverse any adaptive response to acute or chronic normovolemic anemia? If O<sub>2</sub> carrying capacity is not impaired during RBC storage and hematocrit is restored following a transfusion, the cardiovascular consequences can be expected to be reversed assuming there has been no irreversible ischemic organ damage. However, the storage process alters the properties of RBCs, which may impair flow and O<sub>2</sub> release from hemoglobin<sup>21,26</sup> in the microcirculation.

### Microcirculatory effects of anemia and red blood cell transfusions

At the level of the microcirculation, 3 mechanisms may increase the amount of O<sub>2</sub> supplied to tissues by capillary networks. In a model of the microcirculation proposed by Krogh,<sup>93,94</sup> O<sub>2</sub> supply to the tissues may be enhanced through recruitment of previously closed capillaries, increased capillary flow and increased O<sub>2</sub> extraction from existing capillaries. The degree of anemia, the specific tissue bed and a variety of disease processes may affect microcirculatory blood flow and O<sub>2</sub> supply.<sup>1,95,96</sup> As the degree of hemodilution increases and [Hb] decreases, blood viscosity decreases disproportionately in capillary networks. This results in progressive increases in the rate of flow of RBCs through capillaries and proportionate decreases in the time red cells spend in capillaries.<sup>97</sup>

With moderate degrees of anemia, the increased rate of flow may increase the amount of O<sub>2</sub> delivered to tissues.<sup>1</sup> However, during profound anemia, the transit time may be so brief that it interferes with the diffusion of O<sub>2</sub> to cells.<sup>98,99</sup> Indeed, increases in flow rate may be one of the important reasons for the onset of anaerobic metabolism. Although the effect of [Hb] (or hematocrit) on systemic O<sub>2</sub> transport in the central circulation has

been well studied, it remains unclear how a higher hematocrit influences O<sub>2</sub> delivery in the microcirculation.<sup>100–102</sup> Until recently, it has been difficult to obtain *in situ* measurements of blood viscosity, microcirculatory flow, O<sub>2</sub> delivery and cellular respiration,<sup>103</sup> although studies<sup>97,102,104,105</sup> have suggested that microcirculatory stasis and impaired O<sub>2</sub> delivery to the tissues may be directly related to changes in hematocrit. Some theorize that normovolemic hemodilution improves microcirculatory flow and O<sub>2</sub> delivery; others have suggested that hematocrit has limited effects on microcirculatory flow.<sup>106,107</sup>

Transfused RBCs stored in acid-citrate dextrose or citrate-phosphate dextrose may also have different properties than *in vivo* cells. Many changes tend to be related to the duration of storage. Older units of packed RBCs have lower levels of 2,3-DPG, a small molecule that alters the affinity of hemoglobin for O<sub>2</sub>.<sup>21,26,37,72,108–114</sup> Low levels of 2,3-DPG induce a leftward shift in the oxyhemoglobin dissociation curve that may impede delivery of O<sub>2</sub> to the tissues. In addition, storage may alter the characteristics of RBC membranes, decreasing their deformability.<sup>115,116</sup> As a consequence, transfused cells may impair flow in the microcirculation<sup>117</sup> and have a limited ability to release O<sub>2</sub> to tissues. However, storage lesions may be reversible within 24 to 48 hours.

Reports<sup>116,118–121</sup> suggest that disease processes such as sepsis also impair RBC deformability. In conjunction with significant systemic microcirculatory dysfunction, the decrease in RBC deformability may dramatically affect tissue O<sub>2</sub> delivery in sepsis and septic shock.<sup>116,118–120</sup> This body of evidence suggests that transfusion of packed RBCs increases systemic O<sub>2</sub> delivery but may have adverse effects on microcirculatory flow.

### Interaction between pathophysiologic processes and anemia

A number of diseases that affect either the entire body or specific organs may limit adaptive responses to anemia. Heart, lung and cerebrovascular diseases have been proposed to increase the risk of adverse consequences from anemia.<sup>37,122,123</sup> Age, severity of illness and therapeutic interventions may also affect adaptive mechanisms.

The heart, especially the left ventricle, may be particularly prone to adverse consequences of anemia, because the myocardium consumes 60% to 75% of all O<sub>2</sub> delivered to the coronary circulation.<sup>70,80–84,90,124</sup> Such a high extraction ratio is unique to the coronary circulation. As a result, O<sub>2</sub> delivery to the myocardium primarily increases by increasing blood flow.<sup>90,125,186–189</sup> Moreover, most of left ventricular perfusion is restricted to the di-



astolic period, and any shortening its duration (e.g., in tachycardia) constrains blood flow. Laboratory studies<sup>43,81,84,90,124-128</sup> of the effects of normovolemic anemia on the coronary circulation reveal minimal consequences from anemia ([Hb] around 70 g/L) if coronary circulation is normal.<sup>44,78,81,90,125,129</sup> However, myocardial dysfunction and ischemia occur earlier or are more significant in anemic animal models with moderate to high grade coronary stenoses compared with controls with normal [Hb].<sup>124,126-131</sup> The degree of experimental control of variables potentially affecting myocardial O<sub>2</sub> consumption was very limited. Only 1 study<sup>186</sup> maintained left atrial pressure and 3<sup>187-189</sup> controlled perfusion pressure in a separately perfused coronary artery.

The clinical data do not appear to be as consistent. Several studies of patients with coronary artery disease undergoing normovolemic hemodilution do not report an increase in cardiac complications or silent ischemia during ECG monitoring.<sup>51,132-135</sup> In addition, a retrospective analysis involving 224 patients undergoing coronary artery bypass grafting was not able to demonstrate a significant association between the [Hb] and coronary sinus lactate levels (an indicator of myocardial ischemia).<sup>136</sup> In 2 recent cohort studies, moderate anemia was poorly tolerated in perioperative<sup>137</sup> and critically ill patients<sup>138</sup> with cardiovascular disease, confirming observations made in the laboratory. Anemia may also result in significant increases in morbidity and mortality in patients with other cardiac pathologies including heart failure and valvular heart disease,<sup>130</sup> presumably because of the greater burden of the adaptive increase in CO.

During normovolemic anemia, cerebral blood flow increases as [Hb] decreases. Investigators have observed increases ranging from 50% to 500% of baseline values in both laboratory studies<sup>139-145</sup> and in one human study.<sup>146</sup> Increased cerebral blood flow occurs because of overall increases in CO, which is preferentially diverted to the cerebral circulation. Also, as O<sub>2</sub> delivery begins to decrease, cerebral tissues extract more O<sub>2</sub> from the blood. A number of factors, including the degree of hemodilution, the type of fluid used for volume expansion and the volume status (preload) and the extent of the cerebrovascular disease, can modify global or regional cerebral blood flow during anemia.<sup>147,148</sup>

The increase in global cerebral blood flow combined with the possibility of improved flow characteristics across vascular stenoses (improved rheology of blood because of decreased viscosity) prompted a number of laboratory and clinical studies<sup>149-154</sup> investigating hemodilution as a therapy for acute ischemic stroke.<sup>143,145,149,155-157</sup> The laboratory studies suggest that moderate degrees of anemia alone should rarely result in or worsen cerebral ischemia. As a therapy in acute ischemic stroke, hemodi-

lution did not produce a significant overall improvement in clinical outcome. However, because of the large variety of variables that may affect the extent of clinical outcomes, the negative findings may not rule out the possibility of therapeutic benefits. Cerebrovascular disease does not appear to predispose patients to significant ill consequences from anemia.

Changes in O<sub>2</sub> delivery to the brain (as a result of increases or decreases in blood flow) during normovolemic anemia do not uniformly affect various forms of cerebral pathologies. For example, patients with increased intracranial pressure from traumatic brain injury may be adversely affected by increased cerebral blood flow. However, following subarachnoid hemorrhage, mild degrees of normovolemic or hypervolemic anemia may improve overall O<sub>2</sub> delivery, possibly by overcoming the effects of cerebral vasospasm, thereby improving cerebral blood flow through decreased viscosity.<sup>158-161</sup> The effects of moderate to severe anemia in subarachnoid hemorrhage have not been assessed either in laboratory or clinical studies.

Redistribution of CO to the coronary and cerebral circulation during normovolemic anemia results in a shunting of blood away from other organs including the kidneys and bowel. In critically ill patients who are affected by a wide variety of pathologic processes this redistribution may result in increased gut ischemia, bacterial translocation and multisystem organ failure.<sup>5,19,162,163</sup> Critical illness may also tax many of the body's adaptive responses, specifically, cardiac performance<sup>164,165</sup> which may already be responding to increased metabolic demands. Pathologic processes affecting the microcirculation, which are particularly prevalent in this population, may also affect the patient's response to anemia and transfusions.

## Red blood cell transfusion and O<sub>2</sub> kinetics

We identified 13 studies (Table 4) that have evaluated the impact of RBC transfusions on O<sub>2</sub> kinetics. O<sub>2</sub> delivery uniformly increased but O<sub>2</sub> consumption was observed to change in only 5 of the studies. The lack of change in O<sub>2</sub> consumption reflects either methodologic errors<sup>166</sup> or patients with an elevated anaerobic threshold, rather than indicating that additional RBCs were unnecessary as suggested in 1 study.<sup>167</sup> Even though a number of clinical trials<sup>168-170</sup> have attempted to define optimum levels of O<sub>2</sub> delivery, there is still no consensus on which patients are most likely to benefit and which intervention or approach is superior (i.e., fluids, RBCs, inotropic agents or a combination). The results of a recent meta-analysis suggest greater benefit in perioperative patients.<sup>171</sup> However, all experimental protocols

maintained [Hb] above 100 g/L and, therefore, did not compare various RBC transfusion strategies.

## Conclusion

This systematic review of the experimental and clinical evidence revealed that 56% of all studies were well de-

signed and described significant adaptive responses to anemia. The most important adaptive responses involved the cardiovascular system; they consisted of increased CO and a redistribution of blood flow toward the coronary and cerebral circulations and away from the splanchnic vascular beds. The evidence for these physiological responses, especially that from studies that per-

**Table 4: Summary of 13 studies of the effects of red blood cell transfusion on O<sub>2</sub> delivery, O<sub>2</sub> consumption and lactate levels**

| Study                                | Condition in study population    | No. of patients | Average volume of transfusion | Changes after transfusion |                   |                   |           | Comments                                                                                                                                                                                                                                  |
|--------------------------------------|----------------------------------|-----------------|-------------------------------|---------------------------|-------------------|-------------------|-----------|-------------------------------------------------------------------------------------------------------------------------------------------------------------------------------------------------------------------------------------------|
|                                      |                                  |                 |                               | ↑ [Hb]                    | ↑ DO <sub>2</sub> | ↑ VO <sub>2</sub> | ↓ Lactate |                                                                                                                                                                                                                                           |
| Ronco et al <sup>172</sup> (1990)    | PCP                              | 5               | 1.5 U                         | Yes                       | Yes               | Yes               | NA        | All patients had ↑ lactate at baseline. Thermodilution used for DO <sub>2</sub> and VO <sub>2</sub> measurements.                                                                                                                         |
| Fenwick et al <sup>173</sup> (1990)  | ARDS                             | 24              | 1.5 U                         | Yes<br>Yes                | Yes<br>Yes        | No<br>No          | No<br>Yes | Normal lactate group ( <i>n</i> = 1) was compared with high lactate group ( <i>n</i> = 13). Thermodilution catheter used for all measurements. Significant increases in VO <sub>2</sub> in response to transfusion in high lactate group. |
| Ronco et al <sup>174</sup> (1991)    | ARDS                             | 17              | 1.5 U                         | Yes                       | Yes               | No                | NA        | Normal lactate group ( <i>n</i> = 7) was compared with high lactate group ( <i>n</i> = 10). No relationship between VO <sub>2</sub> and DO <sub>2</sub> when VO <sub>2</sub> directly measured with expired gases.                        |
| Shah et al <sup>175</sup> (1982)     | Post-trauma                      | 8               | 1 or 2 U                      | Yes                       | Yes               | Yes               | NA        | Thermodilution used for DO <sub>2</sub> and VO <sub>2</sub> measurements.                                                                                                                                                                 |
| Steffes et al <sup>176</sup> (1991)  | Postoperative + post-trauma      | 21              | 1–2 U                         | Yes                       | Yes               | Yes               | No        | 27 measurements sets in 21 patients. Thermodilution used for DO <sub>2</sub> and VO <sub>2</sub> measurements. Increased lactate levels did not predict VO <sub>2</sub> response.                                                         |
| Babineau et al <sup>167</sup> (1992) | Postoperative                    | 31              | 328 ± 9 mL                    | Yes                       | Yes               | No                | NA        | 32 of 33 transfusions were single units. Thermodilution used for DO <sub>2</sub> and VO <sub>2</sub> measurements. 58% of transfusions did not increase VO <sub>2</sub> .                                                                 |
| Gilbert et al <sup>177</sup> (1988)  | Septic                           | 17              | Δ 20 g/L                      | Yes                       | Yes               | No                | No        | 33 measurement sets in 31 patients. 10 of 17 patients had increased lactate levels. VO <sub>2</sub> significantly increased in high group only.                                                                                           |
| Dietrich et al <sup>178</sup> (1990) | Medical shock (septic/cardiac)   | 32              | 577 mL                        | Yes                       | Yes               | No                | No        | 36 measurement sets in 32 patients. No change in VO <sub>2</sub> after transfusion. Thermodilution used for DO <sub>2</sub> and VO <sub>2</sub> measurements.                                                                             |
| Conrad et al <sup>179</sup> (1990)   | Septic shock                     | 19              | Δ 30 g/L                      | Yes                       | Yes               | No                | No        | Normal lactate group ( <i>n</i> = 8) compared with high lactate group ( <i>n</i> = 11). No increase in VO <sub>2</sub> with transfusion in either group. Thermodilution used for DO <sub>2</sub> and VO <sub>2</sub> measurements.        |
| Marik et al <sup>115</sup> (1993)    | Septic                           | 23              | 3 U                           | Yes                       | Yes               | No                | No        | DO <sub>2</sub> measured independently of VO <sub>2</sub> . Using gastric tonometry, patients receiving old RBCs developed evidence of gastric ischemia.                                                                                  |
| Lorento et al <sup>180</sup> (1993)  | Septic                           | 16              | 2 U                           | Yes                       | Yes               | No                | NA        | Dobutamine significantly increased VO <sub>2</sub> ; RBCs did not. Thermodilution used for DO <sub>2</sub> and VO <sub>2</sub> measurements.                                                                                              |
| Mink et al <sup>181</sup> (1990)     | Septic shock (2 months–6 years)  | 8               | 8–10 mL/kg × 1–2 h            | Yes                       | Yes               | No                | NA        | In pediatric patients, VO <sub>2</sub> did not increase with RBCs. Thermodilution used for DO <sub>2</sub> and VO <sub>2</sub> measurements.                                                                                              |
| Lucking et al <sup>182</sup> (1990)  | Septic shock (4 months–15 years) | 7               | 10–15 mL/kg × 1–3 h           | Yes                       | Yes               | Yes               | NA        | 8 measurement sets in 7 patients. Thermodilution used for DO <sub>2</sub> and VO <sub>2</sub> measurements.                                                                                                                               |

Note: PCP = Pneumocystis carinii pneumonia; ↑[Hb] = increased hemoglobin concentration; ↑DO<sub>2</sub> = increased O<sub>2</sub> delivery; ↑VO<sub>2</sub> = increased O<sub>2</sub> consumption; NA = not available; ARDS = adult respiratory distress syndrome.

mitted the control of many variables, is powerful and convincing. However, there is a remarkable lack, in both quality and quantity, of clinical studies of anemia addressing how these adaptive mechanisms may be involved or affected by a variety of disease processes. Variables, such as age and patient population may also have an effect.

For these reasons, it is not possible to offer guidelines on how to increase, maintain or even to determine optimum O<sub>2</sub> delivery in high-risk patients or how transfusion strategies might best be used under these conditions.

From the brief review of physiologic principles and the strong consensus in the literature, it is evident that cardiac function must be a central consideration in decisions about transfusion in anemia, because of the critical role it plays in assuring adequate O<sub>2</sub> supply to all vital tissues. Particular attention must be paid to the possible presence of coronary artery disease. Patients with coronary disease are more likely to require transfusions to improve O<sub>2</sub> delivery. There is little convincing evidence to support the notion that cerebral ischemia is aggravated by anemia or that this can be prevented by improving O<sub>2</sub> delivery through rapid correction of anemia. Consequently, the arguments favouring transfusions in the presence of ischemic heart disease do not appear to apply to occlusive cerebrovascular disease.

Because high-level evidence on the interactions of concurrent diseases and anemia in various patient populations is lacking, an understanding of the physiologic consequences of anemia, and of the diseases is useful but not sufficient to guide transfusion practice in specific complex clinical conditions. Further clinical and experimental investigation is required to support comprehensive clinical practice guidelines for RBC transfusions.

We believe that research should be conducted to elucidate the effects of adaptive responses of anemia in a variety of diseases. Laboratory studies should explore the interaction between anemia, transfusions and disease. Controlled clinical studies should also be conducted. Research is needed to describe the consequences of prolonged RBC storage in supply-dependent conditions, such as septic shock. Finally, further studies assessing the clinical consequences of various transfusion strategies are required to assess the impact of anemia and transfusions. In the meantime, prudent and conservative management, based on awareness of risks and sound understanding of the normal and pathologic physiology must remain the guiding principle.

This review was sponsored by the Canadian Medical Association. Financial support was provided by Health Canada, the Canadian Blood Agency and the Canadian Red Cross Society, Blood Transfusion Services. Dr. Hébert is an Ontario Ministry of Health Career Scientist.

We are grateful to Lisa Calder, Patricia Chung, Eric Partington and the CMA's Expert Working Group for their support and assistance in preparing this manuscript. We thank Dr. Claudio Martin for his meticulous review of the manuscript and Dr. Anne Carter for providing guidance on this project. We also thank Jessica McGowan for her assistance in performing all computer searches and Christine Niles for her assistance in the preparation of the manuscript.

## References

1. Tuman KJ. Tissue oxygen delivery: the physiology of anemia. *Anesthesiol Clin North Am* 1990;9:451-69.
2. Barcroft J. *The respiratory function of the blood. Part I: Lessons from high altitudes*. New York: Cambridge University Press; 1925.
3. Finch CA, Lenfant C. Oxygen transport in man. *N Engl J Med* 1972;286:407-15.
4. Snyder JV. Oxygen transport: the model and reality. In: Snyder JV, Pinsky MR, editors. *Oxygen transport in the critically ill*. Chicago: Year Book Medical Publishers; 1987:3-15.
5. Schumacker PT, Samsel RW. Oxygen delivery and uptake by peripheral tissues: physiology and pathophysiology. *Crit Care Clin* 1989;5:255-69.
6. Oxman AD, Guyatt GH. Guidelines for reading literature reviews. *Can Med Assoc J* 1988;138:697-703.
7. Oxman AD. Checklists for review articles. *BMJ* 1994;309:648-51.
8. Oxman AD, Cook DJ, Guyatt GH. Users' guides to the medical literature: VI. How to use an overview. *JAMA* 1994;272:1367-71.
9. Woolf SH. Practice guidelines, a new reality in medicine: II. Methods of developing guidelines. *Arch Intern Med* 1992;152:946-52.
10. Tanaka N, Yasumara Y, Nozawa T, Futaki S, Uenishi M, Hiramori K, et al. Optimal contractility and minimal oxygen consumption for constant external work of heart. *J Appl Physiol* 1988;R933-43.
11. Suga H, Hisano R, Goto Y, Yamada O, Igarashi Y. Effect of positive inotropic agents on the relation between oxygen consumption and systolic pressure-volume area in canine left ventricle. *Circ Res* 1983;53:306-18.
12. Suga H, Hayashi T, Shirahata M. Ventricular systolic pressure-volume area as predictor of cardiac oxygen consumption. *Am J Physiol* 1981;H39-44.
13. Sonnenblick EH, Strobeck JE. Current concepts in cardiology: derived indices of ventricular and myocardial function. *N Engl J Med* 1977;296:978-84.
14. Sagawa K, Suga H, Shoukas AA, Bakalar KM. End-systolic pressure/volume ratio: a new index of ventricular contractility. *Am J Cardiol* 1977;40:748-53.
15. Sagawa K. The ventricular pressure-volume diagram revisited. *Circ Res* 1978;43:677-87.
16. Katz AM. *Physiology of the heart*. New York: Raven Press; 1977.
17. Ronco JJ, Fenwick JC, Tweeddale MG, Wiggs BR, Phang PT, Cooper DJ, et al. Identification of the critical oxygen delivery for anaerobic metabolism in critically ill septic and nonseptic humans. *JAMA* 1993;270:1724-30.
18. Shibutani K, Komatsu T, Kubal K, Sanchala V, Kumar V, Bizzarri DV. Critical level of oxygen delivery in anesthetized man. *Crit Care Med* 1983;11:640-3.
19. Nelson DP, Samsel RW, Wood LDH, Schumacker PT. Pathological supply dependence of systemic and intestinal O<sub>2</sub> uptake during endotoxemia. *J Appl Physiol* 1988;64:2410-9.
20. Nelson DP, King CE, Dodd SL, Schumacker PT, Cain SM. Systemic and intestinal limits of O<sub>2</sub> extraction in the dog. *J Appl Physiol* 1987;63:387-94.
21. Sugerman HJ, Davidson DT, Vibul S, Delivoria-Papadopoulos M, Miller LD, Oski FA. The basis of defective oxygen delivery from stored blood. *Surg Gynecol Obstet* 1970;137:733-41.
22. Myburgh JA, Webb RK, Worthley LIG. The p50 is reduced in critically ill patients. *Intensive Care Med* 1991;17:355-8.
23. Parris WCW, Kambam JR, Blanks S, Dean R. The effect of intentional hemodilution on P<sub>50</sub>. *J Cardiovasc Surg* 1988;19:560-2.
24. Iapichino G, Radrizzani D, Solca M, Franzosi MG, Pallavicini FB, Spina G, et al. Restoration of blood 2,3-diphosphoglycerate levels in multi-transfused patients: effect of organic and inorganic phosphate. *Int Surg* 1984;69:113-6.
25. Rodman T, Close HP, Purcell MK. The oxyhemoglobin dissociation curve in anemia. *Ann Intern Med* 1960;52:295-309.
26. Kennedy AC, Valtis DJ. The oxygen dissociation curve in anemia of various types. *J Clin Invest* 1954;33:1372-81.
27. Kahn RC, Zaroulis C, Goetz W, Howland WS. Hemodynamic oxygen transport and 2,3-diphosphoglycerate changes after transfusion of patients in acute respiratory failure. *Intensive Care Med* 1986;12:22-5.
28. Oski FA, Marshall BE, Cohen PJ, Sugerman HJ, Miller LD. Exercise with anemia: the role of the left-shifted or right-shifted oxygen-hemoglobin equilibrium curve. *Ann Intern Med* 1971;74:44-6.
29. Oski FA, Gottlieb AJ, Delavoria-Papadopoulos M, Miller WW. Red-cell 2,3-diphosphoglycerate levels in subjects with chronic hypoxemia. *N Engl J Med* 1969;280:1165-6.

30. Brecher ME, Zylstra-Halling VW, Pineda AA. Rejuvenation of erythrocytes preserved with AS-1 and AS-3. *Am J Clin Pathol* 1991;96:767-9.
31. Studzinski T, Czarnecki A, Gluszak A. Effect of acute posthaemorrhagic anaemia on the level of 2,3-diphosphoglycerate (2,3-DPG) in the erythrocytes of sheep. *Acta Physiol Pol* 1980;31:365-73.
32. Chanutin A, Churnish RR. Effect of organic and inorganic phosphates on the oxygen equilibrium of human erythrocytes. *Arch Biochem Biophys* 1967;121:96.
33. Benesch R, Benesch RE. The effect of organic phosphates from the human erythrocytes on the allosteric properties of hemoglobin. *Biochem Biophys Res Commun* 1967;26:162.
34. Benesch R, Benesch RE, Yu CI. Reciprocal bindings of oxygen and diphosphoglycerate by human hemoglobin. *Proc Natl Acad Sci U S A* 1968;59:526.
35. Wyman J. *Hemoglobin function*. In: Bunn HF, Forget BG, editors. Hemoglobin: molecular, genetic and clinical aspects. Philadelphia: Saunders; 1986:37-60.
36. Bohr C, Hasselbalch KA, Krogh A. Ueber einen in biologischer beziehung wichtigen Einfluss, den die Kohlensäurespannung des Blutes auf dessen Sauerstoff Binding uebt. *Scand Arch Physiol* 1904;16:402-12.
37. Welch HG, Meehan KR, Goodnough LT. Prudent strategies for elective red blood cell transfusion. *Ann Intern Med* 1992;116:393-402.
38. Alexander RH, Ali J, Aprahamian C, Bell RM, Bianco E, Brown R, et al. *Advanced trauma life support: program for physicians*. 5th ed. Chicago: American College of Surgeons; 1993.
39. Brannon ES, Merrill AJ, Warren VJ, Stead EA. The cardiac output in patients with chronic anemia as measured by the technique of right atrial catheterization. *J Clin Invest* 1945;24:332-6.
40. Cane RD. Hemoglobin: how much is enough? *Crit Care Med* 1990;18:1046-7.
41. Duke M, Abelmann WH. The hemodynamic response to chronic anemia. *Circulation* 1969;39:503-15.
42. Chapler CK, Cain SM. The physiologic reserve in oxygen carrying capacity: studies in experimental hemodilution. *Can J Physiol Pharmacol* 1985;64:7-12.
43. Bowens C, Spahn DR, Frasco PE, Smith R, McRae RL, Leone BJ. Hemodilution induces stable changes in global cardiovascular and regional myocardial function. *Int Anesth Res Soc* 1993;76:1027-32.
44. Crystal GJ, Salem MR. Myocardial oxygen consumption and segmental shortening during selective coronary hemodilution in dogs. *Anesth Analg* 1988;67:500-8.
45. Laks H, Pilon RN, Klovekorn WP, Anderson WP, MacCallum JR, O'Connor NT. Acute hemodilution: its effect on hemodynamics and oxygen transport in anesthetized man. *Ann Surg* 1974;180:103-9.
46. Rosberg B, Wulff K. Hemodynamics following normovolemic hemodilution in elderly patients. *Acta Anaesthesiol Scand* 1981;25:402-6.
47. Shah DM, Prichard MN, Newell JC, Karmody AM, Scovell WA, Powers SR, Jr. Increased cardiac output and oxygen transport after intraoperative isovolemic hemodilution: a study in patients with peripheral vascular disease. *Arch Surg* 1980;115:597-600.
48. Rose D, Coutsoftides T. Intraoperative normovolemic hemodilution. *J Surg Res* 1981;31:375-81.
49. Boldt J, Kling D, Weidler B, Zickmann B, Herold C, Dapper F, et al. Acute preoperative hemodilution in cardiac surgery: volume replacement with a hypertonic saline-hydroxyethyl starch solution. *J Cardiothorac Vasc Anesth* 1991;5:23-8.
50. Mouren S, Baron J, Hag B, Arthaud M, Viars P. Normovolemic hemodilution and lumbar epidural anesthesia. *Anesth Analg* 1989;69:174-9.
51. Herregods L, Foubert L, Moerman K, Francois K, Rolly G. Comparative study of limited intentional normovolaemic haemodilution in patients with left main coronary artery stenosis. *Anaesthesia* 1995;50:950-3.
52. Welch M, Knight DG, Carr MH, Smyth JV, Walker MG. The preservation of renal function by isovolemic hemodilution during aortic operations. *J Vasc Surg* 1993;18:858-66.
53. Duke M, Herbert V, Abelmann WH. Hemodynamic effects of blood transfusion in chronic anemia. *N Engl J Med* 1964;271:975-80.
54. Cropp GJA. Cardiovascular function in children with severe anemia. *Circulation* 1969;39:775-84.
55. Roy SB, Bhatia ML, Mathur VS, Virmani S. Hemodynamic effects of chronic severe anemia. *Circulation* 1963;28:346-56.
56. Whitaker W. Some effects of severe chronic anaemia on the circulatory system. *Q J Med* 1956;25:175-83.
57. Woodson RD, Auerbach S. Effect of increased oxygen affinity and anemia on cardiac output and its distribution. *J Appl Physiol* 1982;53:1299-306.
58. Messmer K. Hemodilution: possibilities and safety aspects. *Acta Anaesthesiol Scand* 1988;32(S89):49-53.
59. Messmer K, Lewis DH, Sunder-Plassmann L, Klovekorn WP, Mendler N, Holper K. Acute normovolemic hemodilution. *Eur Surg Res* 1972;4:55-70.
60. Spahn DR, Leone BJ, Reves JG, Pasch T. Cardiovascular and coronary physiology of acute isovolemic hemodilution: a review of nonoxygen-carrying and oxygen-carrying solutions. *Anesth Analg* 1994;78:1000-21.
61. Crosby ET. Perioperative haemotherapy: I. Indications for blood component transfusion. *Can J Anesth* 1992;39:695-707.
62. Hatcher JD, Chiu LK, Jennings DB. Anemia as a stimulus to aortic and carotid chemoreceptors in the cat. *J Appl Physiol* 1978;44:696-702.
63. Murray JF, Escobar E, Rapaport E. Effects of blood viscosity on hemodynamic responses in acute normovolemic anemia. *Am J Physiol* 1969;216:638-42.
64. Fowler NO, Holmes JC. Blood viscosity and cardiac output in acute experimental anemia. *J Appl Physiol* 1975;39:453-6.
65. Baer RW, Vlahakes GJ, Uhlig PN, Hoffman JIE. Maximum myocardial oxygen transport during anemia and polycythemia in dogs. *Am J Physiol* 1987;252:H1086-95.
66. Escobar E, Jones NL, Rapaport E, Murray JF. Ventricular performance in acute normovolemic anemia and effects of beta blockade. *Am J Physiol* 1966;211:877-84.
67. Kowalshyn TJ, Prager D, Young J. Preoperative hemoglobin requirements. *Anesth Analg* 1972;51:75-9.
68. Glick G, Plauth WH, Braunwald E. Role of autonomic nervous system in the circulatory response to acutely induced anemia in unanesthetized dogs. *J Clin Invest* 1964;43:2112-24.
69. American Society of Anesthesiologists Task Force on Blood Component Therapy. Practice guidelines for blood component therapy. *Anesthesiology* 1996;84:732-47.
70. Murray JF, Rapaport E. Coronary blood flow and myocardial metabolism in acute experimental anaemia. *Cardiovasc Res* 1972;6:360-7.
71. Hatcher JD, Jennings DB, Parker JO, Garvock WB. The role of a humoral mechanism in the cardiovascular adjustments over a prolonged period following the production of acute exchange anaemia. *Can J Biochem Physiol* 1963;41:1887-99.
72. Race D, Dedichen H, Schenk WG. Regional blood flow during dextran-induced normovolemic hemodilution in the dog. *J Thorac Cardiovasc Surg* 1967;53:578-86.
73. Martin E, Ott E. Extreme hemodilution in the Harrington procedure. *Bibl Haematol* 1981;47:322-37.
74. Fontana J, Welborn L, Mongan P, Sturm P, Martin G, Bunker R. Oxygen consumption and cardiovascular function in children during profound intraoperative normovolemic hemodilution. *Anesth Analg* 1995;80:219-25.
75. Neill WA, Phelps NC, Oxendine JM, Mahler DJ, Sim DN. Effect of heart rate on coronary blood flow distribution in dogs. *Am J Cardiol* 1973;32:306-12.
76. Neill WA, Oxendine JM, Phelps NC, Anderson RP. Subendocardial ischemia provoked by tachycardia in conscious dogs with coronary stenosis. *Am J Cardiol* 1975;35:30-6.
77. Rodriguez JA, Chamorro GA, Rapaport E. Effect of isovolemic anemia on ventricular performance at rest and during exercise. *J Appl Physiol* 1974;36:28-33.
78. Habler O, Kleen M, Podtschaske A, Hutter J, Tiede M, Kemming G, et al. The effect of acute normovolemic hemodilution on myocardial contractility in anesthetized dogs. *Anesth Analg* 1996;83:451-8.
79. Chapler CK, Stainsby WN, Lillie MA. Peripheral vascular responses during acute anemia. *Can J Physiol Pharmacol* 1981;59:102-7.
80. Fan FC, Chen RYZ, Schuessler GB, Chien S. Effects of hematocrit variations on regional hemodynamics and oxygen transport in the dog. *Am J Physiol* 1980;238:H545-52.
81. Brazier J, Cooper N, Maloney JV, Buckberg G. The adequacy of myocardial oxygen delivery in acute normovolemic anemia. *Surgery* 1974;75:508-16.
82. Bassenge E, Schmid-Schonbein H, von Restorff W, Volger E. Effect of hemodilution on coronary hemodynamics in conscious dogs. Proceedings of an international symposium held in Rotach-Egern. New York: S Karger; 1972.
83. Crystal GJ, Rooney MW, Salem MR. Myocardial blood flow and oxygen consumption during isovolemic hemodilution alone and in combination with adenosine-induced controlled hypotension. *Anesth Analg* 1988;67:539-47.
84. Jan KM, Heldman J, Chien S. Coronary hemodynamics and oxygen utilization after hematocrit variations in hemorrhage. *Am J Physiol* 1980;239:H326-32.
85. Noldge GF, Priebe HJ, Geiger K. Splanchnic hemodynamics and oxygen supply during acute normovolemic hemodilution alone and with isoflurane-induced hypotension in the anesthetized pig. *Anesth Analg* 1992;75:660-74.
86. Noldge GF, Priebe HJ, Bohle W, Buttler KJ, Geiger K. Effects of acute normovolemic hemodilution on splanchnic oxygenation and on hepatic histology and metabolism in anesthetized pigs. *Anesthesiology* 1991;74:908-18.
87. Levy PS, Quigley RL, Gould SA. Acute dilutional anemia and critical left anterior descending coronary artery stenosis impairs end organ oxygen delivery. *J Trauma* 1996;41:416-23.
88. Krieter H, Brueckner UB, Kefalianakis F, Messmer K. Does colloid-induced plasma hyperviscosity in hemodilution jeopardize perfusion and oxygenation of vital organ? *Acta Anaesthesiol Scand* 1995;39:236-44.
89. Richardson TQ, Guyton AC. Effects of polycythemia and anemia on cardiac output and other circulatory factors. *Am J Physiol* 1959;197:1167-70.
90. Jan KM, Chien S. Effect of hematocrit variations on coronary hemodynamics and oxygen utilization. *Am J Physiol* 1977;233:H106-13.
91. Kiel JW, Shepherd AP. Optimal hematocrit for canine gastric oxygenation. *Am J Physiol* 1989;256:H472-7.
92. Kiel JW, Riedel GL, Shepherd AP. Effects of hemodilution on gastric and intestinal oxygenation. *Am J Physiol* 1989;256:H171-8.
93. Krogh A. The number and distribution of capillaries in muscles with calculations of the oxygen pressure head necessary for supplying the tissue. *J Physiol* 1919;52:409.
94. Krogh A. The supply of oxygen to the tissues and the regulation of capillary circulation. *J Physiol* 1919;52:457.

95. Mirhashemi S, Breit GA, Chavez Chavez RH, Intaglietta M. Effects of hemodilution on skin microcirculation. *Am J Physiol* 1988;254:H411-6.
96. Kuo L, Pittman RN. Effect of hemodilution on oxygen transport in arteriolar networks of hamster striated muscle. *Am J Physiol* 1988;254:H331-9.
97. Mirhashemi S, Ertefai S, Messmer K. Medol analysis of the enhancement of tissue oxygenation by hemodilution due to increased microvascular flow velocity. *Microvasc Res* 1987;34:290.
98. Gutierrez G. The rate of oxygen release and its effect on capillary O<sub>2</sub> tension: A mathematical analysis. *Respir Physiol* 1986;63:79.
99. Mirhashemi S, Breit A, Chavez Chavez RH. Effects of hemodilution on skin microcirculation. *Am J Physiol* 1988;254:H411.
100. Messmer KFW. Acceptable hematocrit levels in surgical patients. *World J Surg* 1987;11:41-6.
101. Messmer K, Kreimeier U, Intaglietta M. Present state of intentional hemodilution. *Eur Surg Res* 1986;18:254-63.
102. Messmer K, Sunder-Plassmann L, Klovekorn WP, Holper K. Circulatory significance of hemodilution: rheological changes and limitations. *Adv Microcirc* 1972;4:1-77.
103. Ellis CG, Ellsworth ML, Pittman RN. Determination of red cell oxygenation in vivo by dual video densitometric image analysis. *Am J Physiol* 1990;258:H1216-23.
104. Mirhashemi S, Messmer K, Intaglietta M. Tissue perfusion during normovolemic hemodilution investigated by a hydraulic model of the cardiovascular system. *Int J Microcirc Exp* 1987;6:123.
105. Mirhashemi S, Messmer K, Intaglietta M. Tissue perfusion improvement during normovolemic hemodilution exhibited by a hydraulic model of cardiovascular. *Microvasc Res* 1987;34:240.
106. Sarelius IH. Microcirculation in striated muscle after acute reduction in systemic hematocrit. *Respir Physiol* 1989;78:7-17.
107. Weg JG. Oxygen transport in adult respiratory distress syndrome and other acute circulatory problems: relationship of oxygen delivery and oxygen consumption. *Crit Care Med* 1991;19:650-7.
108. Collins JA. Massive blood transfusion. *Clin Hematol* 1976;5:201-22.
109. Sohmer PR, Dawson RB. Transfusion therapy in trauma: a review of the principles and techniques used in the M.I.E.M.S. program. *Ann Surg* 1979;45:109-25.
110. McConn R, Derrick JB. The respiratory function of blood: transfusion and blood storage. *Anesthesiology* 1972;36:119-27.
111. Jesch F, Webber LM, Dalton JW, Carey JS. Oxygen dissociation after transfusion of blood stored in ACD or CPD solution. *J Thorac Cardiovasc Surg* 1975;70:35-9.
112. Haradin AR, Weed RI, Reed CF. Changes in physical properties of stored erythrocytes: relationship to survival in vivo. *Transfusion* 1969;9:229-37.
113. LaCelle PL. Alteration of deformability of the erythrocyte membrane in stored blood. *Transfusion* 1969;9:238-45.
114. Longster GH, Buckley T, Sikorsky J, Touey LAD. Scanning electron microscope studies of red cell morphology: changes occurring in red cell shape during storage and post transfusion. *Vox Sang* 1972;22:161-70.
115. Marik PE, Sibbald WJ. Effect of stored-blood transfusion on oxygen delivery in patients with sepsis. *JAMA* 1993;269:3024-9.
116. Hurd TC, Dasmahapatra KS, Rush BF, Machiedo GW. Red blood cell deformability in human and experimental sepsis. *Arch Surg* 1988;123:217-20.
117. Simchon S, Jan KM, Chien S. Influence of reduced red cell deformability on regional blood flow. *Am J Physiol* 1987;253:H898-903.
118. Langenfeld JE, Livingston DH, Machiedo GW. Red cell deformability is an early indicator of infection. *Surgery* 1991;110:398-404.
119. Baker CH, Wilmoth FR, Sutton ET. Reduced RBC versus plasma microvascular flow due to endotoxin. *Circ Shock* 1986;20:127-39.
120. Mollitt DL, Poulos ND. The role of pentoxifylline in endotoxin-induced alterations of red cell deformability and whole blood viscosity in the neonate. *J Pediatr Surg* 1991;26:572-4.
121. Powell RJ, Machiedo GW, Rush BF, Dikdan G. Oxygen free radicals: effect on red blood cell deformability in sepsis. *Crit Care Med* 1991;19:732-5.
122. American College of Physicians. Practice strategies for elective red blood cell transfusion. *Ann Intern Med* 1992;116:403-6.
123. Consensus Conference (National Institutes of Health). Perioperative red blood cell transfusion. *JAMA* 1988;260:2700-3.
124. Hagl S, Heimisch W, Meisner H, Erben R, Baum M, Mendler N. The effect of hemodilution on regional myocardial function in the presence of coronary stenosis. *Basic Res Cardiol* 1977;72:344-64.
125. Wilkerson DK, Rosen AL, Sehgal LR, Gould SA, Sehgal HL, Moss GS. Limits of cardiac compensation in anemic baboons. *Surgery* 1988;103:665-70.
126. Geha AS. Coronary and cardiovascular dynamics and oxygen availability during acute normovolemic anemia. *Surgery* 1976;80:47-53.
127. Geha AS, Baue AE. Graded coronary stenosis and coronary flow during acute normovolemic anemia. *World J Surg* 1978;2:645-52.
128. Most AS, Ruocco NA, Gewirtz H. Effect of a reduction in blood viscosity on myocardial oxygen delivery distal to a moderate coronary stenosis. *Circulation* 1986;74:1085-92.
129. Spahn DR, Smith RL, Veronee CD, McRae RL, Hu W, Menius AJ, et al. Acute isovolemic hemodilution and blood transfusion: effects on regional function and metabolism in myocardium with compromised coronary blood flow. *J Thorac Cardiovasc Surg* 1993;105:694-704.
130. Kobayashi H, Smith CE, Fouad-Tarazi FM, Wicker P, Estafanos GF. Circulatory effects of acute normovolemic haemodilution in rats with healed myocardial infarction. *Cardiovasc Res* 1989;23:842-51.
131. Tucker WY, Bean J, Vandevanter S, Cohn LH. The effect of hemodilution on experimental myocardial infarct size. *Eur Surg Res* 1980;12:1-11.
132. Herregods L, Foubert L, Moerman A, Francois K, Rolly G. Comparative study of limited intentional normovolemic hemodilution in patients with left main coronary artery stenosis. *Anesth Analg* 1995;50:950-3.
133. Spahn DR, Schmid ER, Seifert B, Pasch T. Hemodilution tolerance in patients with coronary artery disease who are receiving chronic b-adrenergic blocker therapy. *Anesth Analg* 1996;82:687-94.
134. Kim YD, Katz NM, Ng L, Nancherla A, Ahmed SW, Wallace RB. Effects of hypothermia and hemodilution on oxygen metabolism and hemodynamics in patients recovering from coronary artery bypass operations. *J Thorac Cardiovasc Surg* 1989;97:36-42.
135. Catoire P, Saada M, Liu N, Delaunay L, Rauss A, Bonnet F. Effect of preoperative normovolemic hemodilution on left ventricular segmental wall motion during abdominal aortic surgery. *Anesth Analg* 1992;75:654-9.
136. Doak GJ, Hall RI. Does hemoglobin concentration affect perioperative myocardial lactate flux in patients undergoing coronary artery bypass surgery? *Anesth Analg* 1995;80:910-6.
137. Carson JL, Duff A, Poses RM, Berlin JA, Spence RK, Trout R, et al. Effect of anaemia and cardiovascular disease on surgical mortality and morbidity. *Lancet* 1996;348:1055-60.
138. Hébert PC, Wells G, Tweeddale M, Martin C, Marshall J, Pham B, et al. Does transfusion practice affect mortality in critically ill patients? *Am J Respir Crit Care Med* 1997. In press.
139. Kimura H, Hamaaki N, Yamamoto M, Tomonaga M. Circulation of red blood cells having high levels of 2,3-bisphosphoglycerate protects rat brain from ischemic metabolic changes during hemodilution. *Stroke* 1995;26:1431-7.
140. Reasoner D, Ryu K, Hindman B, Cutkomp J, Smith T. Marked hemodilution increases neurologic injury after focal cerebral ischemia in rabbits. *Anesth Analg* 1996;82:61-7.
141. Yanaka K, Camarata P, Spellman S, McDonald D, Heros RC. Optimal timing of hemodilution for brain protection in a canine model of focal cerebral ischemia. *Stroke* 1996;27:906-12.
142. Lin S, Chiou T, Song W, Chiang Y. Isovolemic hemodilution normalizes the prolonged passage of red cells and plasma through cerebral microvessels in the partially ischemic forebrain of rats. *J Cereb Blood Flow Metab* 1996;16:280-9.
143. Korosue K, Heros RC. Mechanism of cerebral blood flow augmentation by hemodilution in rabbits. *Stroke* 1992;23:1487-92.
144. Hyodo A, Heros RC, Tu YK. Acute effects of isovolemic hemodilution with crystalloids in a canine model of focal cerebral ischemia. *Stroke* 1989;20:534-40.
145. Heros RC, Korosue K. Hemodilution for cerebral ischemia. *Stroke* 1989;20:423-7.
146. Tu YK, Liu H. Effects of isovolemic hemodilution on hemodynamics, cerebral perfusion, and cerebral vascular reactivity. *Stroke* 1996;27:441-5.
147. Davis DH, Sundt TM. Relationship of cerebral blood flow to cardiac output, mean arterial pressure, blood volume, and alpha and beta blockade in cats. *J Neurosurg* 1980;52:745-54.
148. Wood JH, Simeone FA, Kron RE, Snyder LL. Experimental hypervolemic hemodilution: physiological correlations of cortical blood flow, cardiac output, and intracranial pressure with fresh blood viscosity and plasma volume. *Neurosurgery* 1984;14:709-23.
149. Goslinga H, Eijzenbach V, Heuvelmans JH. Custom-tailored hemodilution with albumin and crystalloids in acute ischemic stroke. *Stroke* 1992;23:181-8.
150. Vorstrup S, Andersen A, Juhler M. Hemodilution increases cerebral blood flow in acute ischemic stroke. *Stroke* 1989;20:884-9.
151. Mast H, Marx P. Neurological deterioration under isovolemic hemodilution with hydroxyethyl starch in acute cerebral ischemia. *Stroke* 1991;22:680-3.
152. Scandinavian Stroke Study Group. Multicenter trial of hemodilution in acute ischemic stroke. *Stroke* 1988;19:464-71.
153. Hemodilution in Stroke Study Group. Hypervolemic hemodilution treatment of acute stroke. Results of a randomized multicenter trial using pentastarch. *Stroke* 1989;20:317-23.
154. Strand T. Evaluation of long-term outcome and safety after hemodilution therapy in acute ischemic stroke. *Stroke* 1992;23:657-62.
155. Koller M, Haenny P, Hess K. Adjusted hypervolemic hemodilution in acute ischemic stroke. *Stroke* 1990;21:1429-34.
156. Korosue K, Heros RC, Ogilvie CS. Comparison of crystalloids and colloids for hemodilution in a model of focal cerebral ischemia. *J Neurosurg* 1990;73:576-84.
157. Cole DJ, Schell RM, Przybelski RJ. Focal cerebral ischemia in rats: effect of hemodilution with alpha-alpha cross-linked hemoglobin on CBF. *J Cereb Blood Flow Metab* 1992;12:971-6.
158. Awad I, Carter L, Spetzler R, Medina M, Williams F, Jr. Clinical vasospasm after subarachnoid hemorrhage: response to hypervolemic hemodilution and arterial hypertension. *Stroke* 1987;18:365-72.
159. Pritz MB, Giannotta SL, Kindt GW, McGillicuddy JE, Prager RL. Treatment of patients with neurological deficits associated with cerebral vasospasm

- by intravascular volume expansion. *Neurosurgery* 1978;3:364-8.
160. Kudo T, Suzuki S, Iwabuchi T. Importance of monitoring the circulating blood volume in patients with cerebral vasospasm after subarachnoid hemorrhage. *Neurosurgery* 1981;9:514-20.
  161. Kassell N, Sasaki T, Colohan A, Nazar G. Cerebral vasospasm following aneurysmal subarachnoid hemorrhage. *Stroke* 1985;16:562.
  162. Gutierrez G, Lund N, Bryan-Brown CW. Cellular oxygen utilization during multiple organ failure. *Crit Care Clin* 1989;5:271-87.
  163. Carrico CJ, Meakins JL, Marshall JC, Fry DE, Maier RV. Multiple-organ-failure syndrome. *Arch Surg* 1986;121:196-208.
  164. Walley KR, Hebert PC, Wakai Y, Wilcox PG, Road JD, Cooper DJ. Decrease in left ventricular contractility after tumor necrosis factor-alpha infusion in dogs. *J Appl Physiol* 1994;76:1060-7.
  165. Parrillo JE, Parker MM, Natanson C, Suffredini AF, Danner RL, Cunnion RE, et al. Septic shock in humans: advances in the understanding of pathogenesis, cardiovascular dysfunction, and therapy. *Ann Intern Med* 1990;113:227-42.
  166. Russell JA, Wiggs BR. Oxygen kinetics: pitfalls in clinical research revisited. *J Crit Care* 1990;5:213-7.
  167. Babineau TJ, Dzik WH, Borlase BC, Baxter JK, Bistrrian BR, Benotti PN. Reevaluation of current transfusion practices in patients in surgical intensive care units. *Am J Surg* 1992;164:22-5.
  168. Gattinoni L, Brazzi L, Pelosi P, Latini R, Tognoni G, Pesenti A, et al. A trial of goal-oriented hemodynamic therapy in critically ill patients. *N Engl J Med* 1995;333:1025-32.
  169. Boyd O, Ground M, Bennett D. A randomized clinical trial of the effect of deliberate perioperative increase of oxygen delivery on mortality in high-risk surgical patients. *JAMA* 1993;270:2699-707.
  170. Hayes MA, Timmins AC, Yau EHS, Palazzo M, Hinds CJ, Watson D. Elevation of systemic oxygen delivery in the treatment of critically ill patients. *N Engl J Med* 1994;330:1717-22.
  171. Heyland DK, Cook DJ, King D, Kernerman P, Brun-Buisson C. Maximizing oxygen delivery in critically ill patients: a methodologic appraisal of the evidence. *Crit Care Med* 1996;24:517-24.
  172. Ronco JJ, Montaner JSG, Fenwick JC, Ruedy J, Russell JA. Pathologic dependence of oxygen consumption on oxygen delivery in acute respiratory failure secondary to AIDS-related *Pneumocystis carinii* pneumonia. *Chest* 1990;98:1463-6.
  173. Fenwick JC, Dodek PM, Ronco JJ, Phang PT, Wiggs B, Russell JA. Increased concentrations of plasma lactate predict pathologic dependence of oxygen consumption on oxygen delivery in patients with adult respiratory distress syndrome. *J Crit Care* 1990;5:81-6.
  174. Ronco JJ, Phang PT, Walley KR, Wiggs B, Fenwick JC, Russell JA. Oxygen consumption is independent of changes in oxygen delivery in severe adult respiratory distress syndrome. *Am Rev Respir Dis* 1991;143:1267-73.
  175. Shah DM, Gottlieb ME, Rahm RL, Stratton HH, Barie PS, Paloski WH, et al. Failure of red blood cell transfusion to increase oxygen transport or mixed venous PO<sub>2</sub> in injured patients. *J Trauma* 1982;22:741-6.
  176. Steffes CP, Bender JS, Levison MA. Blood transfusion and oxygen consumption in surgical sepsis. *Crit Care Med* 1991;19:512-7.
  177. Gilbert EM, Haupt MT, Mandanas RY, Huaringa AJ, Carlson RW. The effect of fluid loading, blood transfusion, and catecholamine infusion on oxygen delivery and consumption in patients with sepsis. *Am Rev Respir Dis* 1986;134:873-8.
  178. Dietrich KA, Conrad SA, Hebert CA, Levy GL, Romero MD. Cardiovascular and metabolic response to red blood cell transfusion in critically ill volume-resuscitated nonsurgical patients. *Crit Care Med* 1990;18:940-4.
  179. Conrad SA, Dietrich KA, Hebert CA, Romero MD. Effect of red cell transfusion on oxygen consumption following fluid resuscitation in septic shock. *Circ Shock* 1990;31:419-29.
  180. Lorente JA, Landin L, De Pablo R, Renes E, Rodriguez-Diaz R, Liste D. Effects of blood transfusion on oxygen transport variables in severe sepsis. *Crit Care Med* 1993;21:1312-8.
  181. Mink RB, Pollack MM. Effect of blood transfusion on oxygen consumption in pediatric septic shock. *Crit Care Med* 1990;18:1087-91.
  182. Lucking SE, Williams TM, Chaten FC, Metz RI, Mickell JJ. Dependence of oxygen consumption on oxygen delivery in children with hyperdynamic septic shock and low oxygen extraction. *Crit Care Med* 1990;18:1316-9.

---

**Correspondence to:** Dr. Paul C. Hébert, Department of Medicine, LM-11, Ottawa General Hospital, 501 Smyth Rd., Ottawa ON K1H 8L6

**Reprint requests to:** Dr. Anne Carter, Director of Health Programs, Canadian Medical Association, 1867 Alta Vista Dr., Ottawa ON K1G 3Y6; fax 613 731-1779; cartea@cma.ca
